# Supplementary material for: Lgl cortical dynamics are independent of binding to the Scrib-Dlg complex but require Dlg-dependent restriction of aPKC
Source: Oxford University Press journal article supplement (doi:10.1242/dev.186593), 2020-07-14
Supplement: dev186593supp.pdf [file dev186593supp.pdf]

## SUPPLEMENTARY INFORMATION

## Supplemental Figures

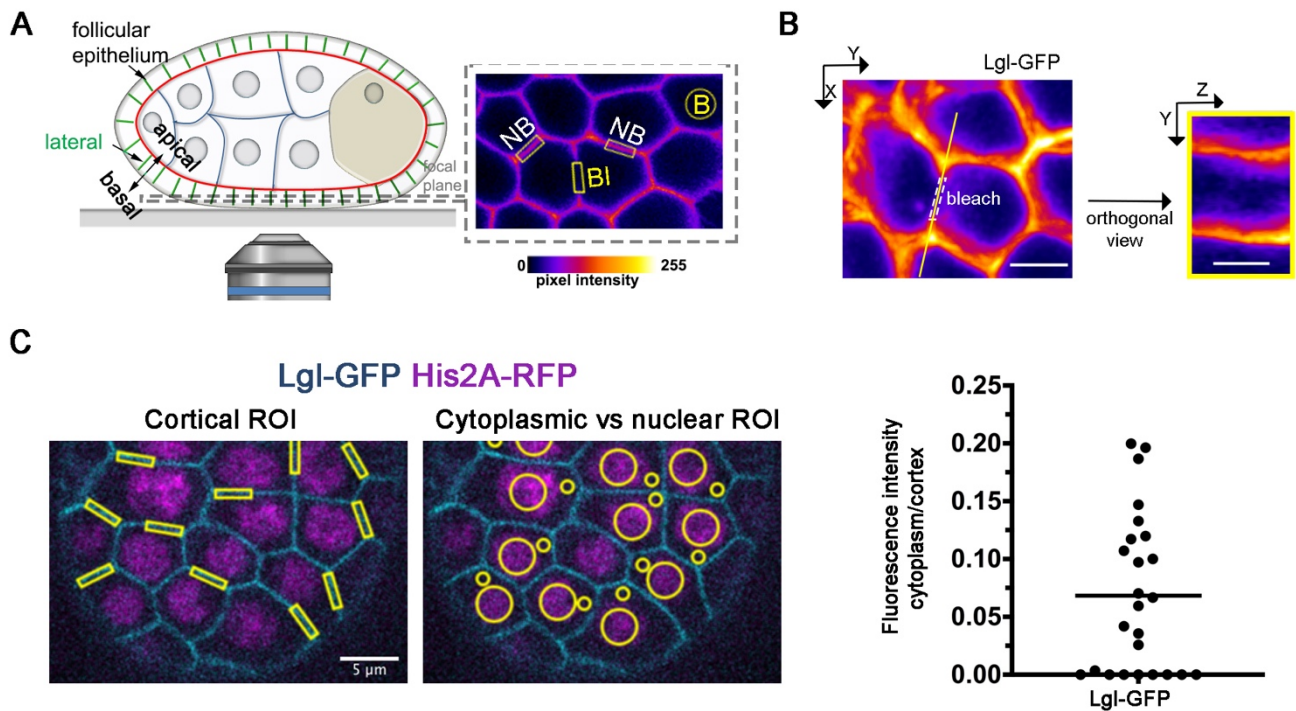

**Figure S1: FRAP experiments to monitor Lgl dynamic behavior in the lateral cortex of the follicle cells**

(A) Scheme of an egg chamber indicating the lateral focal plane selected for FRAP. A lateral cross-section of the follicular epithelium shows Lgl-GFP pseudo-colored with the respective look-up table and pixel intensities, together with the ROIs selected for photobleaching (BI), for measurement of the fluorescence loss during acquisition in two non-adjacent regions of the cortex (NB) and the circular ROI used for measuring the background intensity. The bleach laser is parallel to the lateral cortex of cells imaged at the surface of the egg chamber, which reduces any contribution of cytoplasmic diffusion for fluorescence recovery by bleaching the entire lateral cortex while minimizing any bleaching of the cytoplasm. (B) Maximum intensity projection of a Z-stack (18 slices with a 0.5  $\mu\text{m}$  step) after photobleaching (dashed rectangle) in fixed follicle cells expressing Lgl-GFP shows efficient bleaching of the lateral cortex along Z. The orthogonal YZ view of the photobleached region is shown to the right. Scale bar = 5  $\mu\text{m}$ . (C) Single confocal plane selections were used to quantify the cytoplasmic/cortex ratio of endogenously expressed Lgl-GFP and show that there is a negligible amount of cytoplasmic Lgl. A 3  $\mu\text{m}$  x 0.67  $\mu\text{m}$  rectangular ROI was defined to delimit the cortex, and the nuclear marker (H2A-RFP) was used to precisely distinguish between nuclear background and cytoplasmic signal, which was collected using a circular ROI with 1  $\mu\text{m}$  in diameter (ROIs used for analysis are depicted in the figure). Plot includes data from 3 egg chambers (n=25).

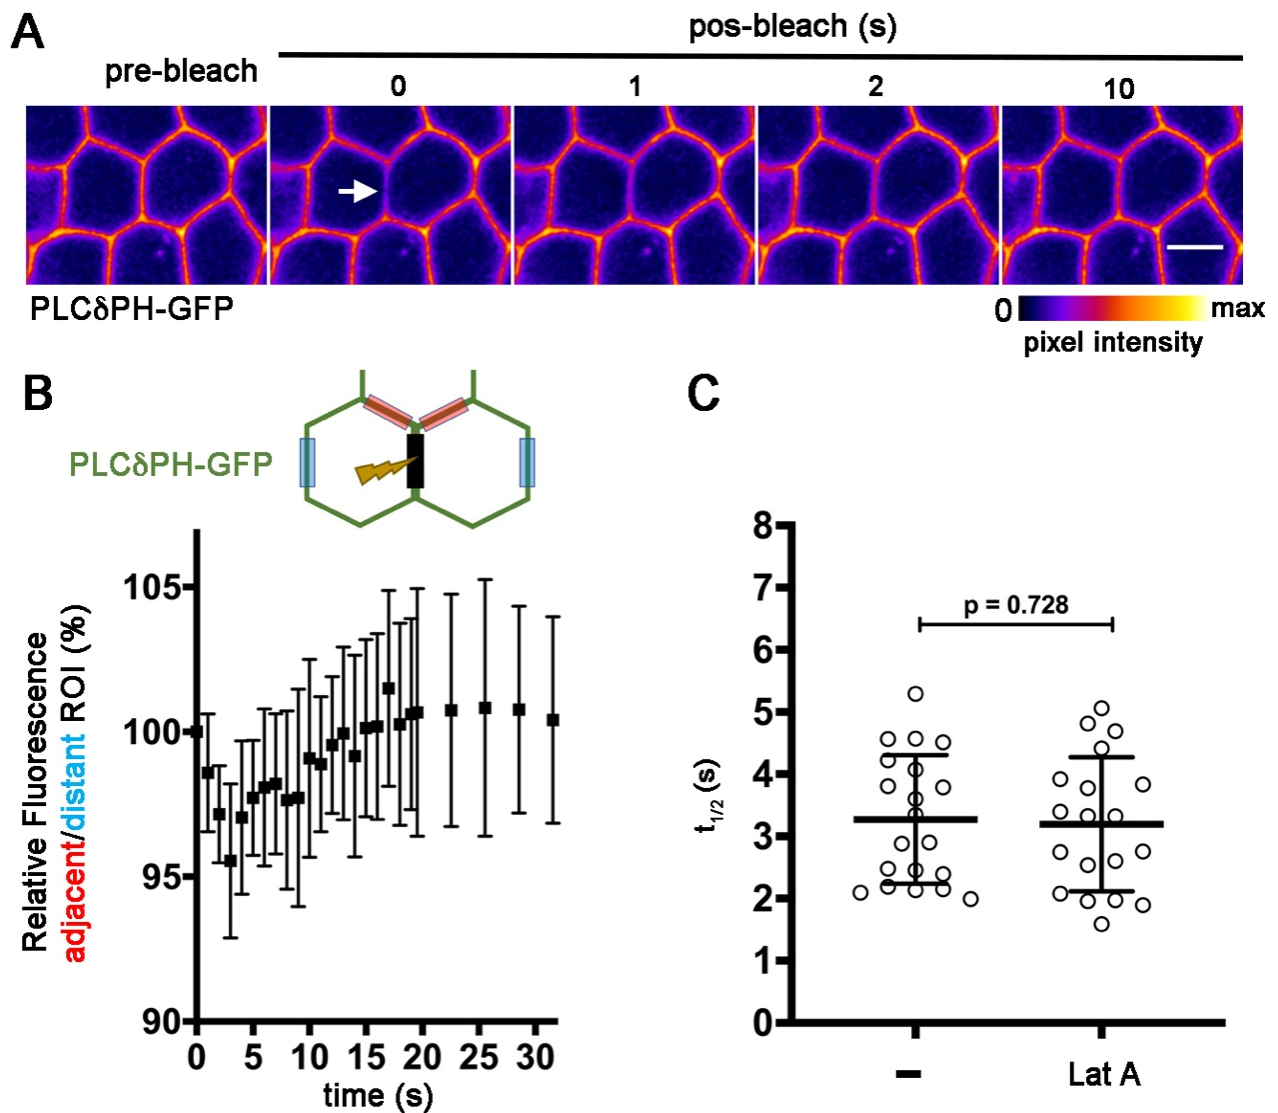

**Figure S2: FRAP measurements of PLC $\delta$ PH-GFP dynamic behavior**

(A) Pseudo-colored images of UAS driven PLC $\delta$ PH-GFP show FRAP experiments in the lateral membrane (arrow). (B) Plot representing the PLC $\delta$ PH-GFP mean intensity ( $\pm$  95% CI,  $n=12$ ) in the interfaces adjacent (red) to the bleached region normalized to the mean intensity of distant interfaces (blue). Local reduction of fluorescence after photobleaching indicates the diffusion of PLC $\delta$ PH-GFP molecules in and out of the bleached region. (C) PLC $\delta$ PH dynamics are not affected by actin cortex disruption. Half-time distributions of UAS-driven PLC $\delta$ PH-GFP in control ( $n=20$ ) and upon Latrunculin A treatment (Lat A,  $n=19$ ) show no statistical difference. Mean $\pm$ SD are shown.  $p$ -value calculated using the Mann-Whitney U-test. Scale bars = 10  $\mu$ m

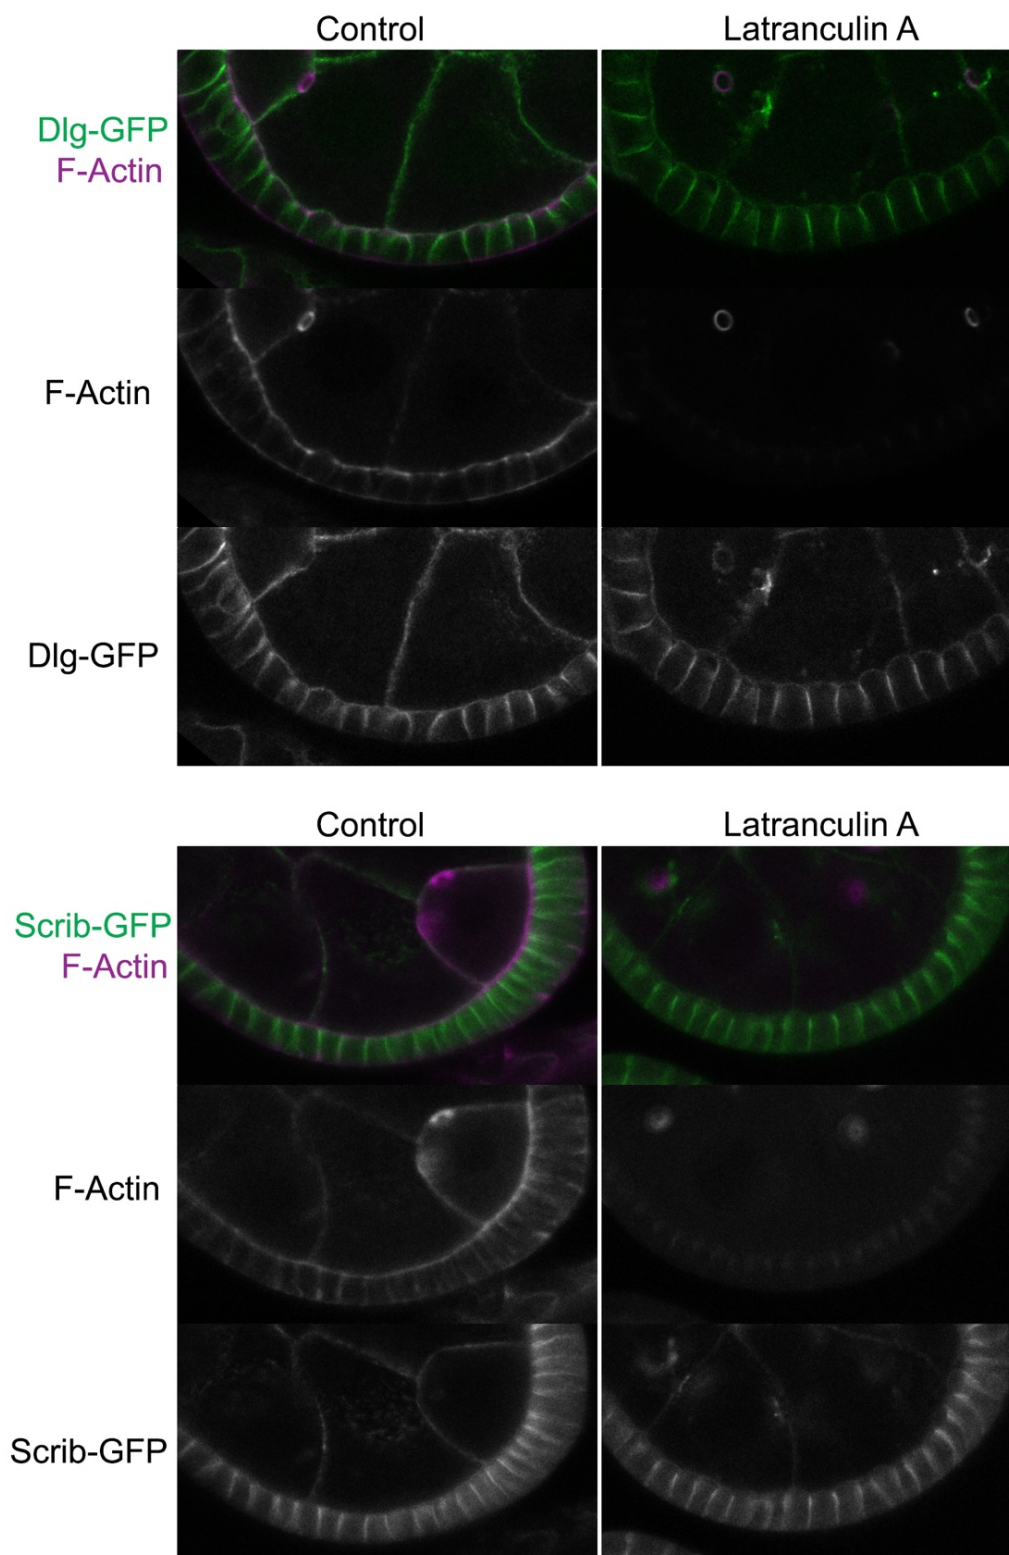

**Figure S3: Actin cortex disruption does not affect the localization of Dlg and Scrib**

Confocal images of egg chambers expressing Dlg-GFP and Scrib-GFP with or without Latrunculin A treatment. Disruption of the cytoskeleton is validated by F-actin staining (magenta and as a separated channel).

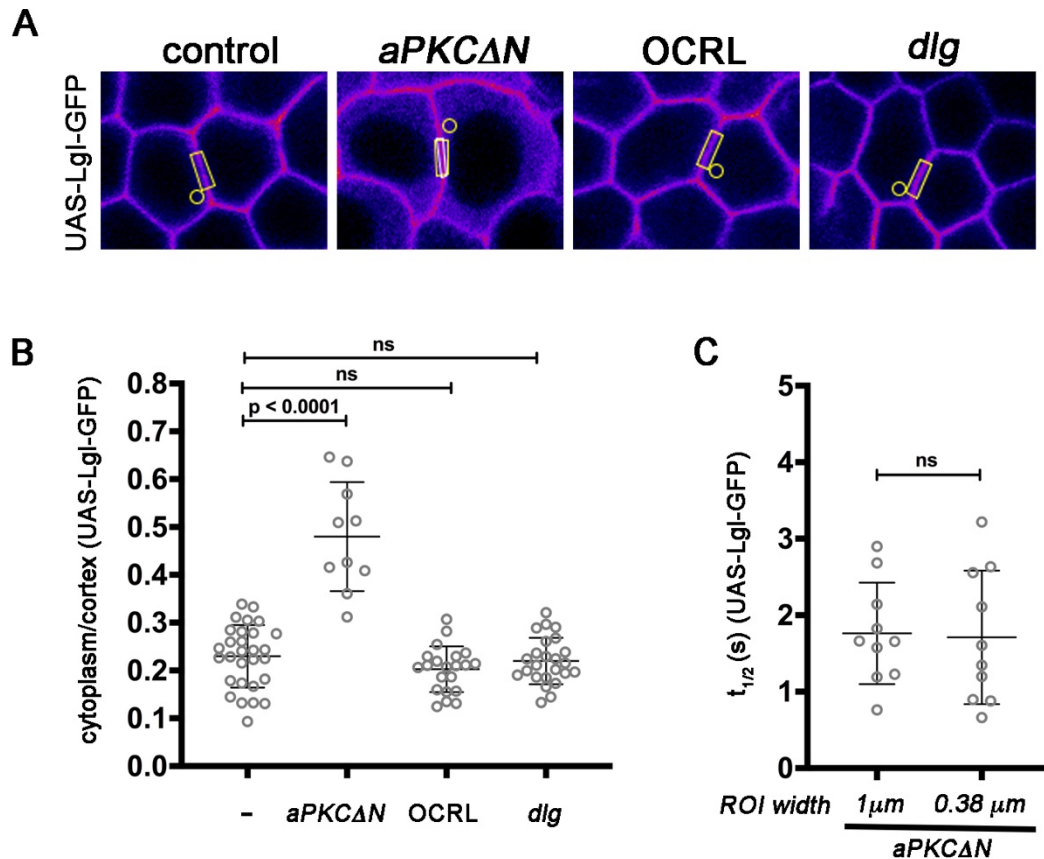

**Figure S4: Quantification of cytoplasm/cortex ratio and analysis of the possible contribution of cytoplasmic accumulation for the dynamic behavior of cortical Lgl**

(**A,B**) Examples representing the images used for calculating the cytoplasmic/cortex ratio of UAS Lgl-GFP in control, expression of *aPKCΔN*, PIP<sub>2</sub> depletion by optogenetic recruitment of OCRL and *dlg* mutants. A 3x1  $\mu$ m rectangular ROI and a 1  $\mu$ m diameter cytoplasmic ROI (yellow rectangular and circular selections) were used to measure the mean intensities of the selected cytoplasmic and cortical regions for the 6 pre-bleach frames in the complete FRAP datasets. (**B**) The cytoplasm/cortex ratio for UAS Lgl-GFP is not significantly different between the control and PIP<sub>2</sub> depletion (OCRL) and *dlg* mutant cells. Ectopic expression of *aPKCΔN* condition induces strong cytoplasmic accumulation, which leads to higher cytoplasmic/cortex ratio. (**C**) Fast Lgl dynamics in *aPKCΔN* are not attributed to the diffusion of the surrounding cytoplasmic pool. To test if the rapid timescale of cytoplasmic diffusion had a major contribution to the reduced half-time of Lgl fluorescence recovery in Figure 2F, FRAP data was re-quantified using a ROI with smaller width (33% of the original one (white rectangular selection in S4A) to measure the mean cortical intensity removing the surrounding cytoplasm. The timescale of recovery is identical between the two methods of quantification. The datasets in this figure are the same as the figures 2: control = 29, *aPKCΔN* = 10, OCRL = 21, *dlg* = 24. Mean  $\pm$  SD are shown. p-values were calculated using the Mann-Whitney U-test.



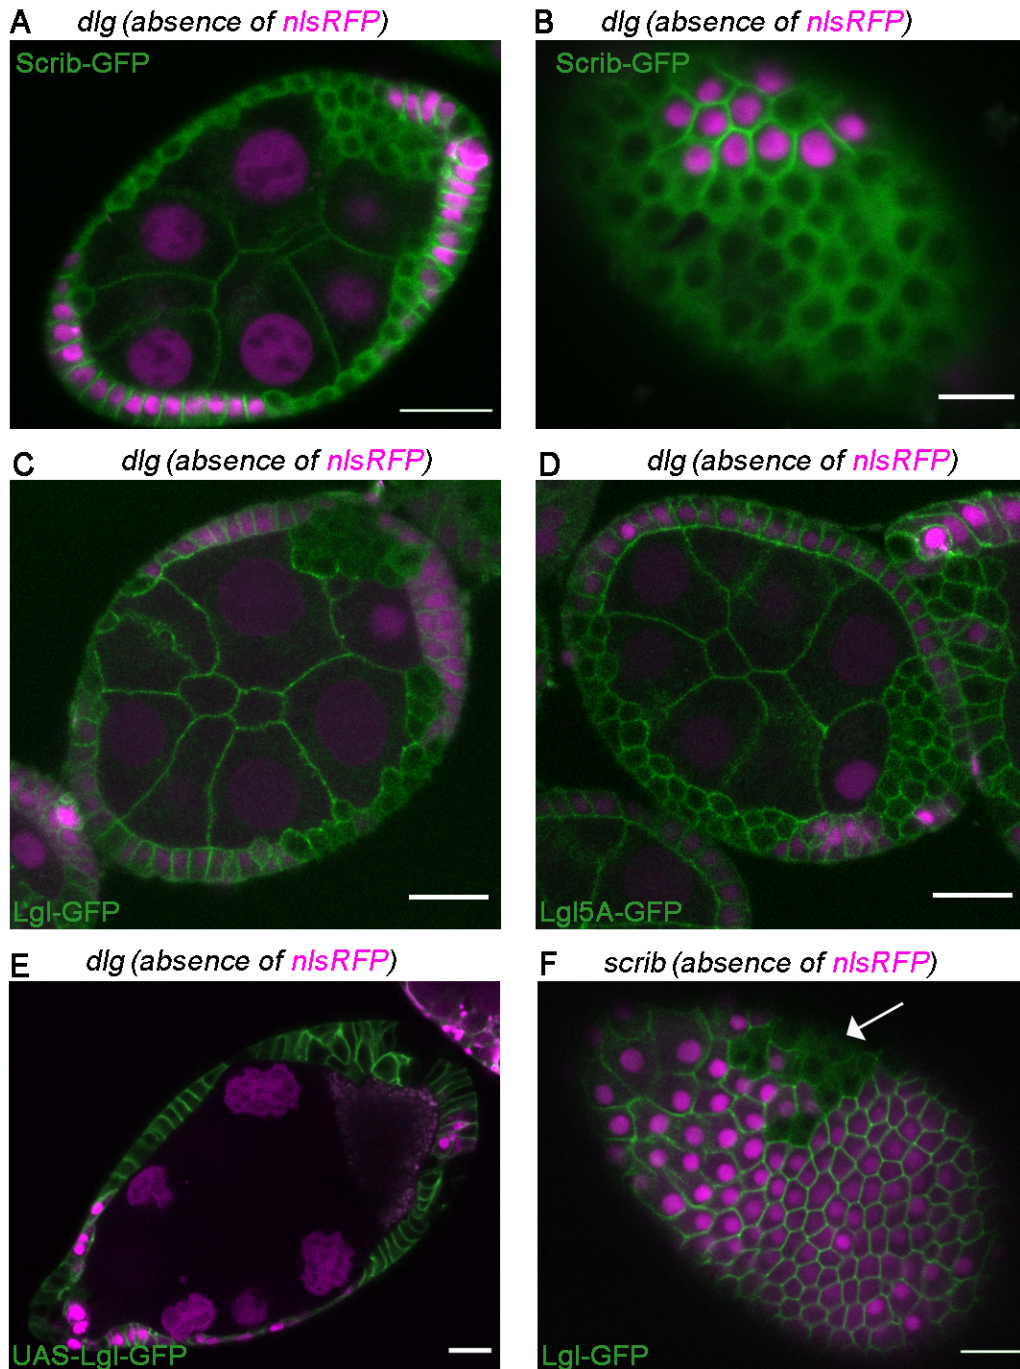

**Figure S5: Mislocalization of basolateral polarity proteins in *dlG* and *scrib* mutants.**

(A-E) Confocal images of *dlG*<sup>4</sup> mutant clones marked by absence of *nls-RFP* (magenta) in the follicular epithelium show: mislocalization of Scrib-GFP and (C) Lgl-GFP from the basolateral cortex, and (D) cortical localization of endogenously expressed Lgl<sup>5A</sup>-GFP. (E) Lgl-GFP remains cortical when overexpressed. (F) Mislocalization of Lgl-GFP in *scrib*<sup>2</sup> mutants (white arrow) marked by absence of *nls-RFP* (magenta) in the follicular epithelium. Lateral cross sections (B, F) and midsagittal (A, C, D, E) views are shown. Image E was collected from a live sample. Scale bars: 20  $\mu$ m

**Table S1: Parameters obtained for one-exponential fit of FRAP recovery curves**

| Figures          | Experiment                                            | Plateau | Half-time (s) | R <sup>2</sup> | p value   | N curves |
|------------------|-------------------------------------------------------|---------|---------------|----------------|-----------|----------|
| <b>2B</b>        | UAS-Lgl-GFP (Control)                                 | 81.34   | 13.80 ± 3.022 | 0.97           | _____     | 16       |
|                  | UAS-Lgl-GFP with LatA                                 | 83.33   | 11.13 ± 3.241 | 0.96           | p= 0.0055 | 24       |
| <b>2D,2F, 3I</b> | UAS-Lgl-GFP (Control)                                 | 85.03   | 12.64 ± 2.099 | 0.96           | _____     | 29       |
| <b>2F</b>        | UAS-Lgl-GFP in aPKCΔN                                 | 78.98   | 1.762 ± 0.663 | 0.80           | p< 0.0001 | 10       |
| <b>2D</b>        | UAS-Lgl-GFP with pmOCRL                               | 84.95   | 8.947 ± 1.744 | 0.96           | p< 0.0001 | 21       |
|                  | UAS-Lgl-GFP with pmOCRL in LatA                       | 85.76   | 7.820 ± 2.124 | 0.94           | p<0.0001  | 16       |
| <b>3I</b>        | UAS-Lgl-GFP in <i>dlg</i> <sup>A</sup>                | 85.44   | 8.960 ± 1.810 | 0.94           | p< 0.0001 | 25       |
| <b>2G</b>        | Lgl-GFP (Control)                                     | 84.81   | 10.85 ± 3.321 | 0.93           | _____     | 43       |
|                  | Lgl-GFP in aPKC RNAi                                  | 85.11   | 10.24 ± 3.182 | 0.88           | p= 0.30   | 26       |
|                  | Lgl <sup>SSA</sup> - GFP                              | 82.73   | 9.797 ± 2.746 | 0.87           | p= 0.10   | 35       |
| <b>3J</b>        | UAS-Lgl <sup>BA</sup> -GFP (Control)                  | 84.24   | 13.11 ± 3.317 | 0.95           | _____     | 22       |
|                  | UAS-Lgl <sup>BA</sup> -GFP in <i>dlg</i> <sup>A</sup> | 86.02   | 11.97 ± 3.380 | 0.95           | p=0.34    | 22       |
|                  | UAS-Lgl <sup>BA</sup> -GFP with pmOCRL                | 79.30   | 8.313 ± 3.198 | 0.93           | p<0.0001  | 20       |
| <b>3K</b>        | Lgl <sup>SSA</sup> - GFP (Control)                    | 83.01   | 10.52 ± 2.516 | 0.86           | _____     | 18       |
|                  | Lgl <sup>SSA</sup> - GFP in <i>dlg</i> <sup>A</sup>   | 83.72   | 11.31 ± 4.536 | 0.86           | p= 0.87   | 21       |
|                  | Lgl <sup>SSA</sup> - GFP in <i>scrib</i>              | 84.73   | 10.70 ± 3.278 | 0.88           | p > 0.99  | 26       |
|                  | Lgl <sup>SSA</sup> - GFP with pmOCRL                  | 84.91   | 6.742 ± 2.594 | 0.75           | p= 0.0006 | 12       |

Mean values obtained for Plateau, half-time and R<sup>2</sup> by averaging parameters from each individual curve. SD is indicated for the half-time of recovery. p values show the statistical differences between the perturbation and the control of each group and were calculated using the Mann-Whitney U-test.

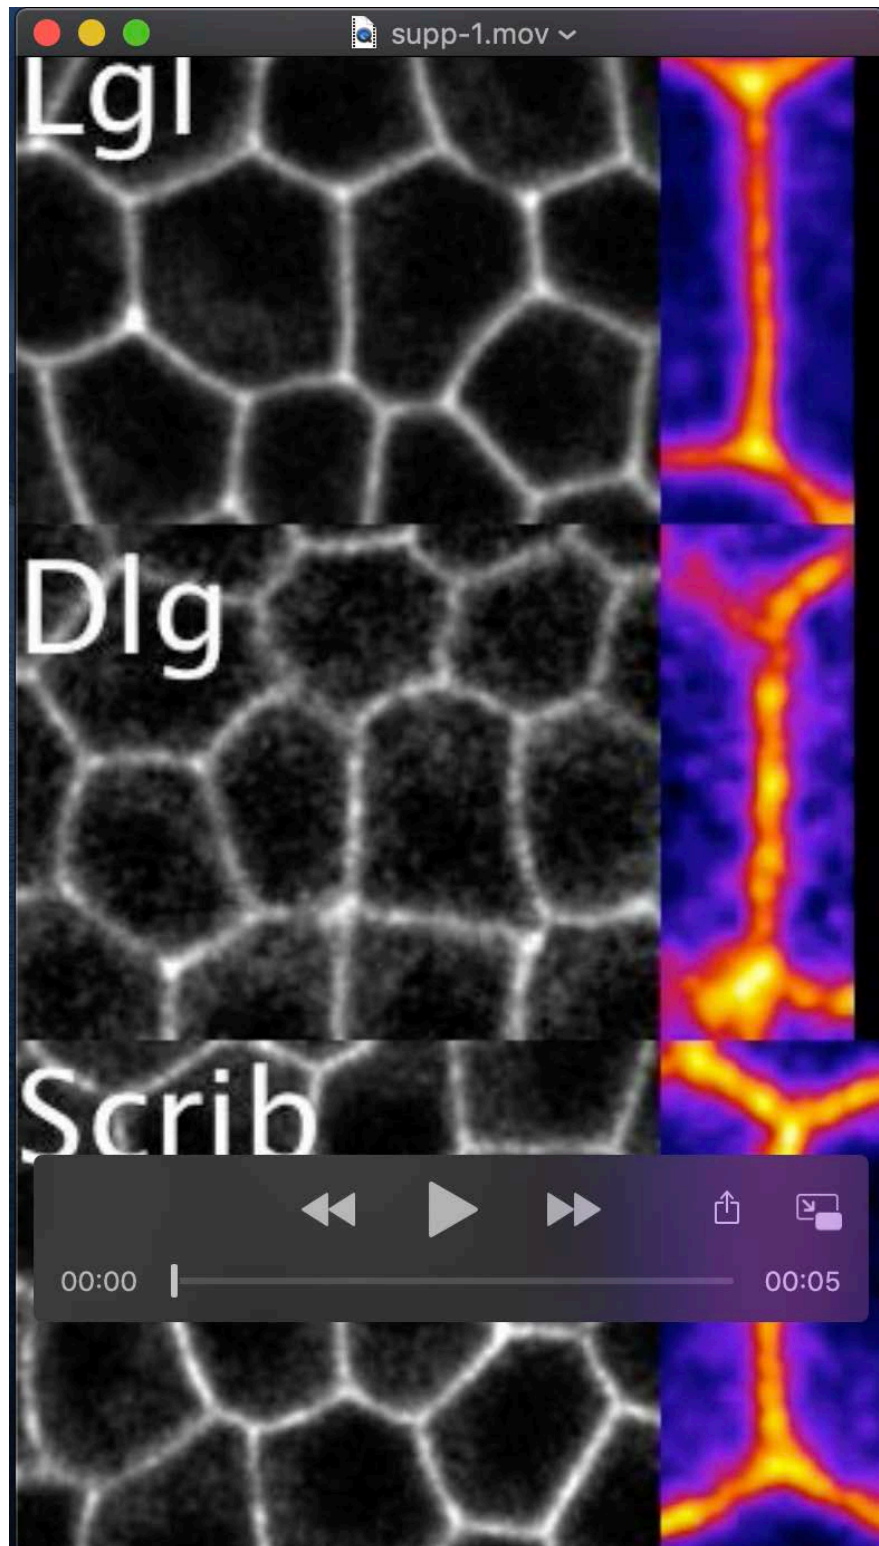

**Movie 1:** Time-lapse movies show FRAP experiments with Lgl-GFP, Dlg-GFP and Scrib-GFP in the *Drosophila* follicular epithelium. Datasets were re-assembled to represent the three experiments in the same temporal scale. A close up of the bleached ROI is represented with pseudo-colored pixel intensity. Time is shown in seconds after the first frame post-photobleaching ( $t = 0s$ ).

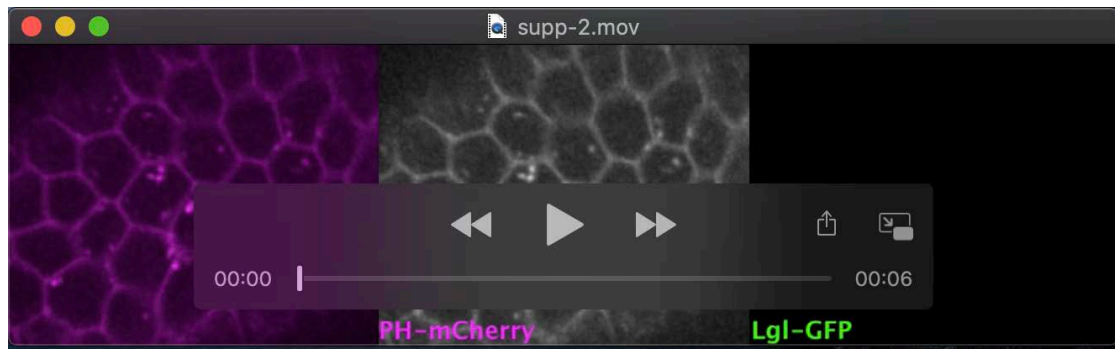

**Movie 2:** Time-lapse movie shows the fast light-dependent removal of PIP<sub>2</sub> sensor PH-mCherry from the plasma membrane in the follicular epithelium. Lgl-GFP remains cortical and the general organization of the tissue is maintained. Individual channels and composite for Lgl-GFP and PH-mCherry are shown.

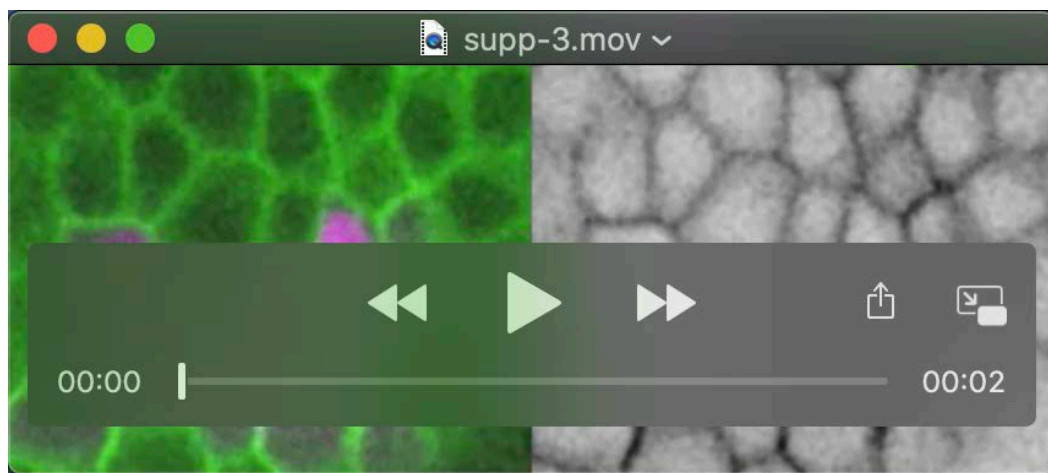

**Movie 3:** Time-lapse movie shows that Lgl-GFP is recovered at the cortex of *dlg<sup>A</sup>; aPKC<sup>as4</sup>/aPKC<sup>K06430</sup>* mutant cells (absence of nsRFP – magenta) after the addition of 100  $\mu$ M of ATP analogue 1NA-PP1. Time is shown in minutes.
